# Supplementary figures and images for: Nutritional control of mRNA isoform expression during developmental arrest and recovery in C. elegans
Source: HighWire-hosted journal article supplement (doi:10.1101/gr.133587.111), 2012-04-26

Sup. Fig. 4

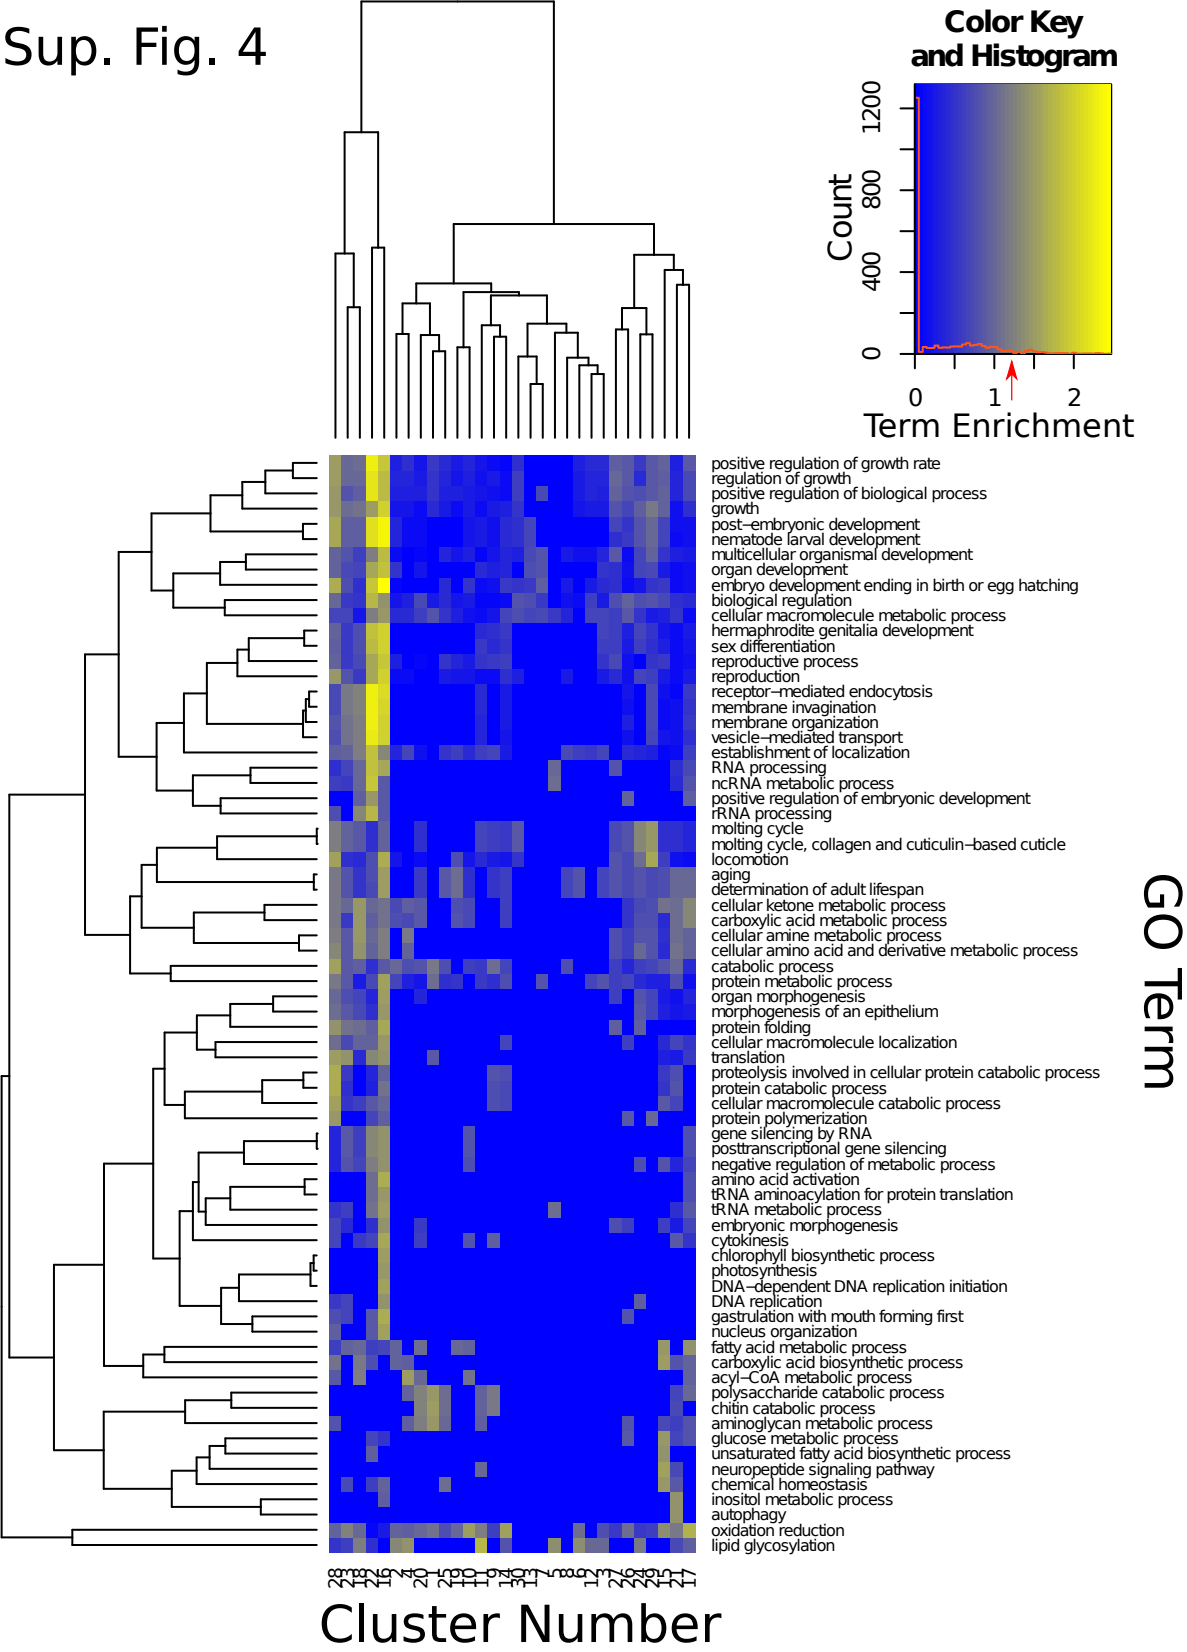

Supplement: Maxwell_Sup_Fig4.pdf [file Maxwell_Sup_Fig4.pdf]
